# Supplementary material
Source: HighWire-hosted journal article supplement (https://dtb.bmj.com/content/62/1/6)
Supplement: inline-supplementary-material-2 [file inline-supplementary-material-2.pdf]

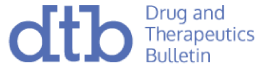

### **Competing interests**

In order to maintain its independence, DTB has a strict policy on competing interests and these include *personal financial interests* and *organisational financial interests*. Competing interests also include any advisory relationship with the pharmaceutical industry or related healthcare products industry (eg, medical devices or diagnostics).

***All authors who write articles that could influence therapeutic choices (eg, drug articles and treatment reviews) must be free from all personal financial and organisational competing interests.***

***Please see below for definitions.***

### **Personal financial interest**

A personal financial interest is considered present when payments are made directly to an individual (eg, fees, honoraria) or where an individual receives benefits from a third party who is not their main employer, such as a fellowship, equipment, writing or administrative assistance, or travel and accommodation expenses; or where an individual owns stocks and shares, patents, or other assets.

Examples include:

- Paid consultancy or directorship or employment with pharmaceutical industry
- Ownership of stocks and shares\*
- Patent ownership
- Paid membership of speakers panels/bureaus and advisory board
- Payment or honoraria for lectures, presentations
- Acting as an expert witness
- Being in receipt of a fellowship, equipment, writing, or administrative support
- Travel and accommodation expenses
- Writing or consulting for promotional or communications company
- Paid or unpaid roles and involvement with industry funded clinical trials.

\*We do not consider personal financial interests to be present in the case of assets over which individuals have no control, such as unit trusts, occupational pension funds, and accrued pension rights.

### **Organisational financial interests**

An organisational financial interest is said to exist where the interest belongs at arm's length to the individual—for example, where payments are made to the individual's organisation rather than to their own bank account.

Examples include:

- Payments for talks
- Research grants
- Funds for staff or department

**Declarations must cover the last three calendar years.**

***If anything changes during the writing of the article please let us know.***

**Please disclose any competing interests. All author disclosure statements are published as supplementary files with articles.**

**Please complete the form and return it to: [dphizackerley@bmj.com](mailto:dphizackerley@bmj.com)**



## DISCLOSURE FORM

|                                  |                                    |
|----------------------------------|------------------------------------|
| Date:                            | 21 September 2023                  |
| Your name:                       | Dr Jane Ravenscroft                |
| Email address:                   | Jane.ravenscroft@nuh.nhs.uk        |
| Article title:                   | Managing Acne vulgaris – an update |
| Manuscript number:<br>(if known) |                                    |

In the interest of transparency, we ask you to disclose *all* relationships/activities/interests listed below that are related to the content of your manuscript. “Related” means any relation with for-profit or not-for-profit third parties whose interests may be affected by the content of the manuscript. Disclosure represents a commitment to transparency and does not necessarily indicate a bias.

If you are in doubt about whether to list a relationship/activity/interest, it is preferable that you do so.

The following questions apply to the author’s relationships/activities/interests as they relate to the current manuscript only.

The author’s relationships/activities/interests should be defined broadly. For example, if your manuscript pertains to the epidemiology of hypertension, you should declare all relationships with manufacturers of any medication, even if that medication is not mentioned in the manuscript.

For all items the time frame for disclosure is the past 36 months.

| Time frame: past 36 months                                                                             | Name all entities with whom you have this relationship or state “none” | Comments (eg, if payments were made to you or to your institution) |
|--------------------------------------------------------------------------------------------------------|------------------------------------------------------------------------|--------------------------------------------------------------------|
| Paid consultancy or directorship or employment with pharmaceutical industry                            | None                                                                   |                                                                    |
| Stock or stock options                                                                                 | None                                                                   |                                                                    |
| Patents planned, issued or pending                                                                     | None                                                                   |                                                                    |
| Fees/honoraria for lectures, presentations, speakers bureaus, manuscript writing or educational events | None                                                                   |                                                                    |

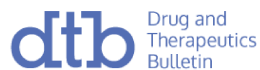

|                                                                                          |                                                                                                                                                    |                                                                                                                          |
|------------------------------------------------------------------------------------------|----------------------------------------------------------------------------------------------------------------------------------------------------|--------------------------------------------------------------------------------------------------------------------------|
| Acting as an expert witness                                                              | <b>None</b>                                                                                                                                        |                                                                                                                          |
| Receipt of equipment, materials, drugs, medical writing support, gifts or other services | <b>None</b>                                                                                                                                        |                                                                                                                          |
| Support for attending meetings and/or travel                                             | <b>None</b>                                                                                                                                        |                                                                                                                          |
| Writing or consulting for promotional or communications company                          | <b>None</b>                                                                                                                                        |                                                                                                                          |
| Participation on a Data Safety Monitoring Board or Advisory Board                        | <b>Chair of MHRA isotretinoin implementation expert working group</b><br><br><b>Expert reviewer for NICE technology appraisals on eczema drugs</b> | <b>Payment made to me by MHRA for attending meetings</b><br><br><b>Payment made to me by NICE for attending meetings</b> |
| Paid or unpaid roles as part of industry funded clinical trials                          | <b>None</b>                                                                                                                                        |                                                                                                                          |
| Receipt of equipment, materials, drugs, medical writing, gifts or other services         | <b>None</b>                                                                                                                                        |                                                                                                                          |
| Other financial or non-financial interests                                               | <b>None</b>                                                                                                                                        |                                                                                                                          |

|                                                                                         |            |
|-----------------------------------------------------------------------------------------|------------|
|                                                                                         | <b>Yes</b> |
| <b>I have answered every question and have not altered the wording of the questions</b> |            |
